# Supplementary material for: Cu(ii)-TACN complexes selectively induce antitumor activity in HepG-2 cells via DNA damage and mitochondrial-ROS-mediated apoptosis
Source: Royal Society of Chemistry journal article supplement (doi:10.1039/c9dt03641e), 2019-12-03
Supplement: c9dt03641e1.pdf [file c9dt03641e1.pdf]

## Supporting Information

### **Cu(II)-TACN complexes selectively induced antitumor activities in HepG-2 cells by DNA damage and mitochondrial-ROS-mediated apoptosis**

Ming Liu,<sup>a,†</sup>Xue-Qing Song,<sup>b,†</sup> Yuan-Di Wu,<sup>a</sup> Jing Qian,<sup>a\*</sup> Jing-Yuan Xu<sup>b\*</sup>

<sup>a</sup>Tianjin Key Laboratory of Structure and Performance for Functional Molecules; Key Laboratory of Inorganic-Organic Hybrid Functional Material Chemistry, Ministry of Education; College of Chemistry, Tianjin Normal University, Tianjin 300387, P. R. China

<sup>b</sup>Tianjin Key Laboratory on Technologies Enabling Development of Clinical Therapeutics and Diagnostics (Theranostics), School of Pharmacy, Tianjin Medical University, Tianjin 300070, P. R. China

\*Corresponding authors: <sup>a</sup>[qianjinger@aliyun.com](mailto:qianjinger@aliyun.com) (J. Qian) <sup>b</sup>[xujingyuan@tmu.edu.cn](mailto:xujingyuan@tmu.edu.cn) (J.-Y. Xu)

<sup>†</sup>These authors contributed equally.

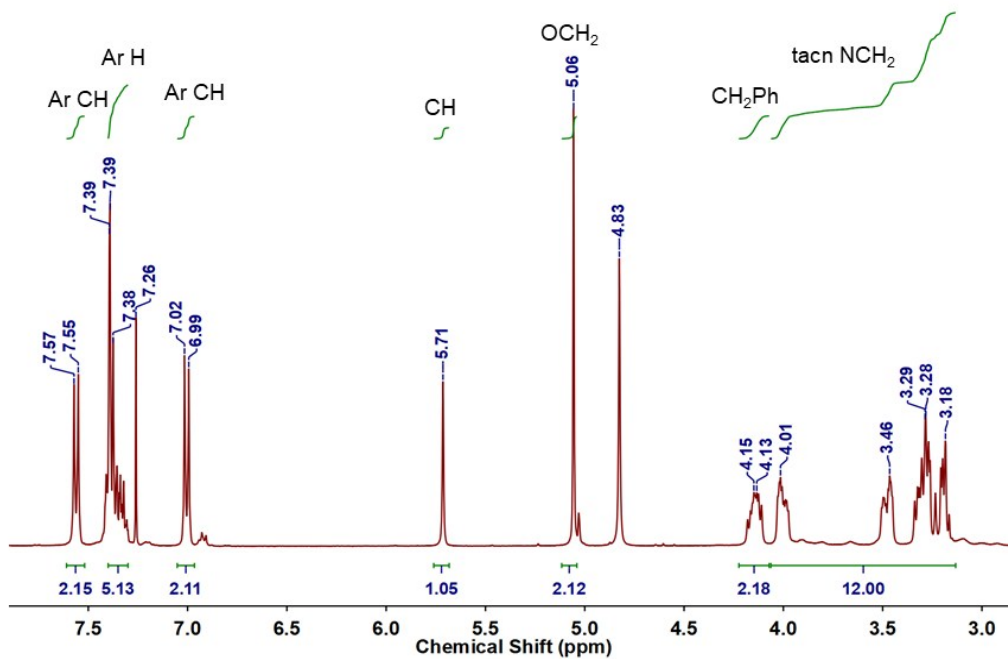

A

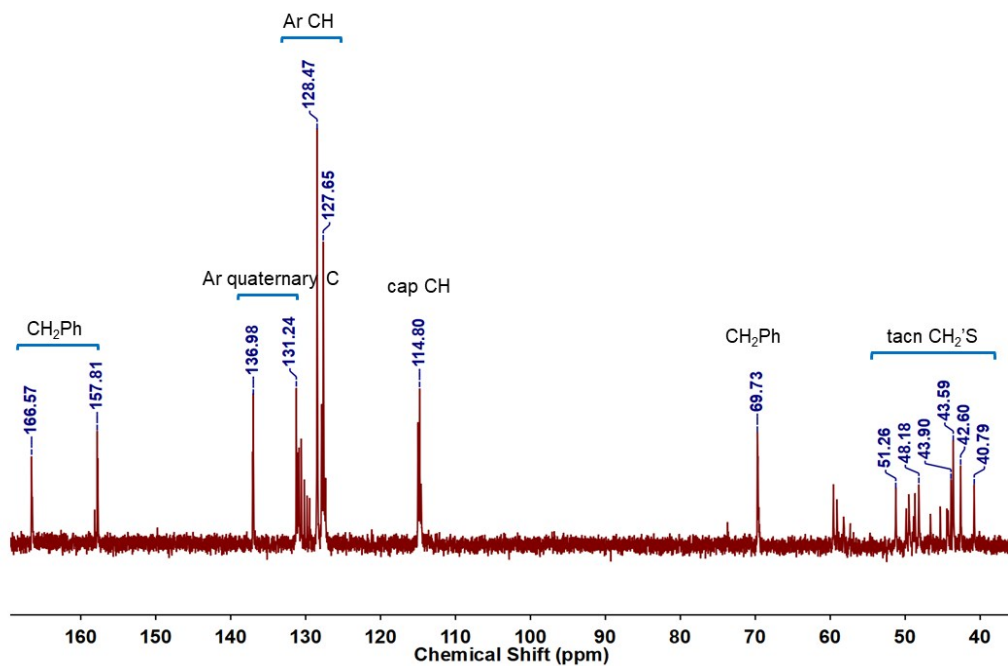

B

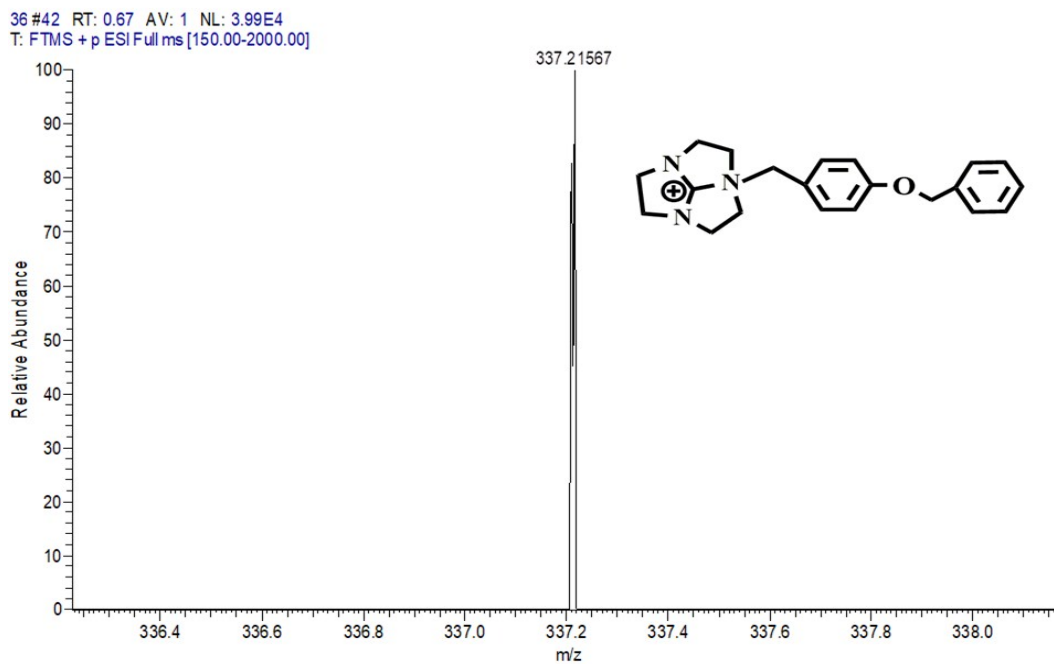

C

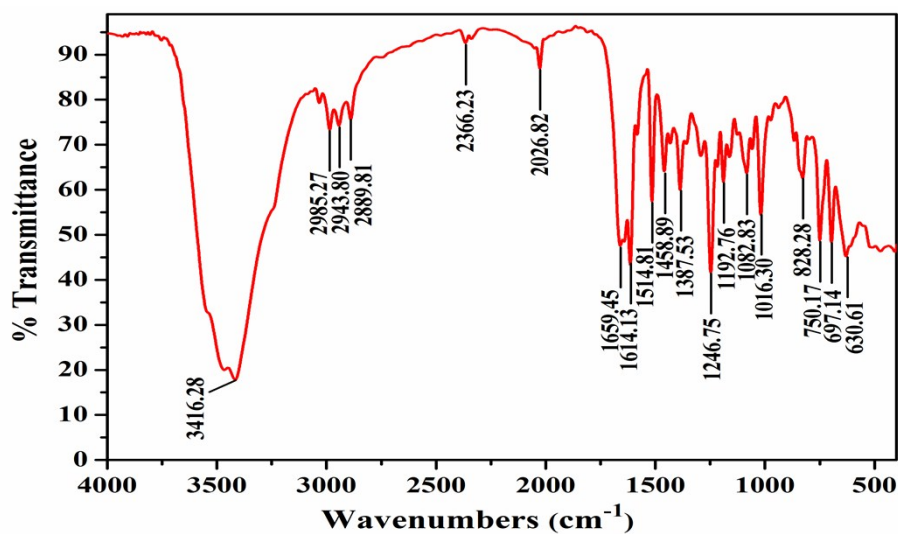

D

**Fig. S1.** Synthesis of 4-benzyloxy-benzyl-tricyclo[5.2.1.0<sup>4,10</sup>]decane chloride: (A) 400 MHz <sup>1</sup>HNMR (CDCl<sub>3</sub>, 298 K); (B) 100 MHz <sup>13</sup>CNMR (D<sub>2</sub>O, 305 K); (C) ESI-mass spectrum. Attributions: 337.22; (D) FTIR patterns.

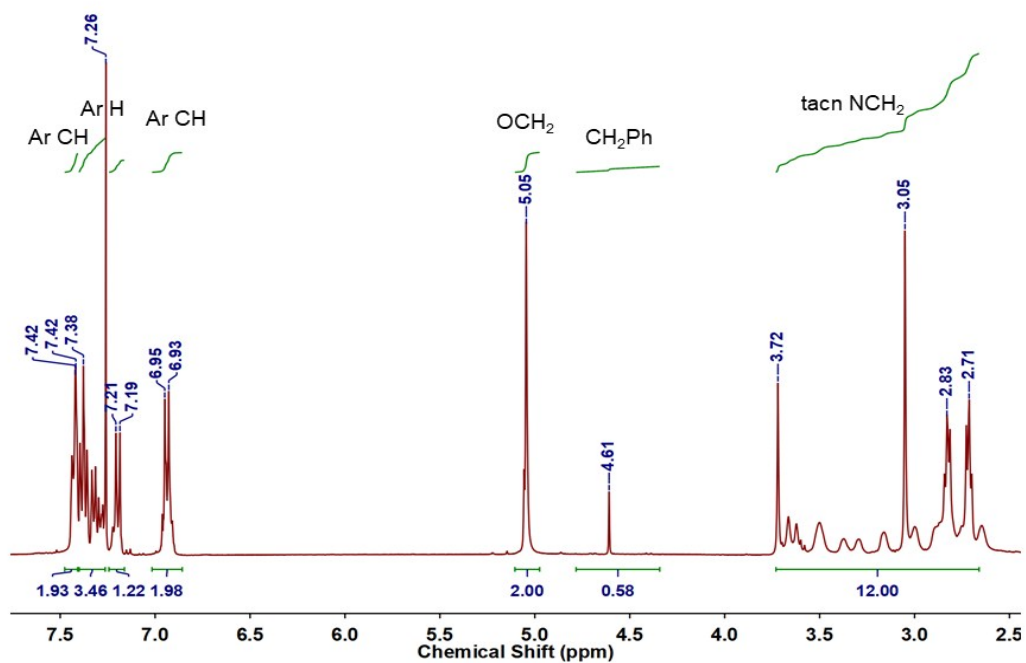

A

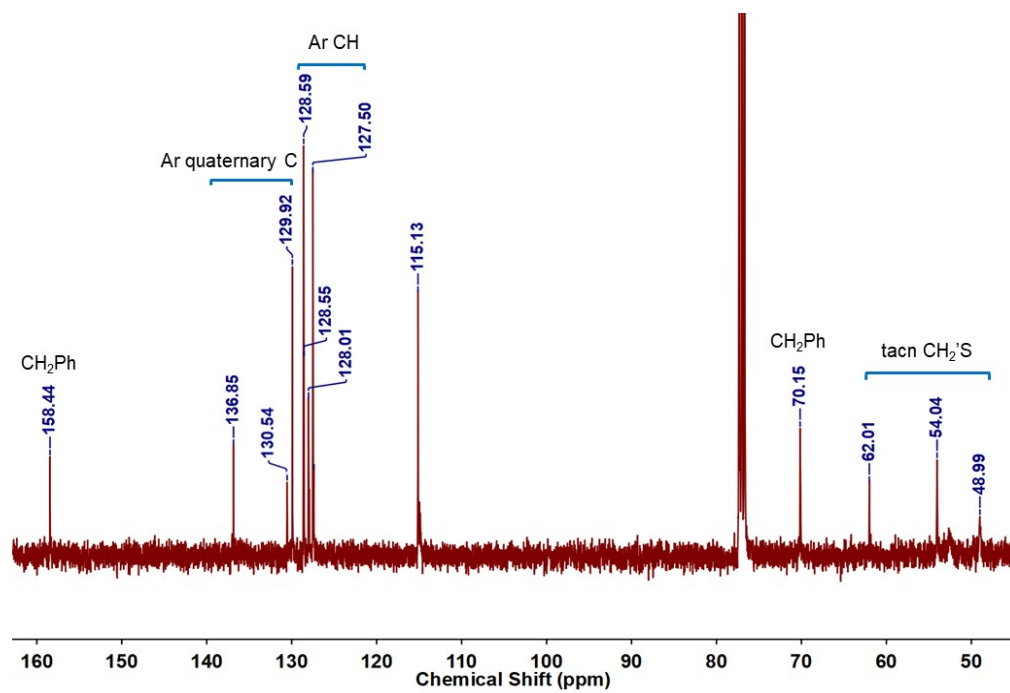

B

37 #52 RT: 0.84 AV: 1 NL: 2.46E4  
T: FTMS + p ESI Full ms [150.00-2000.00]

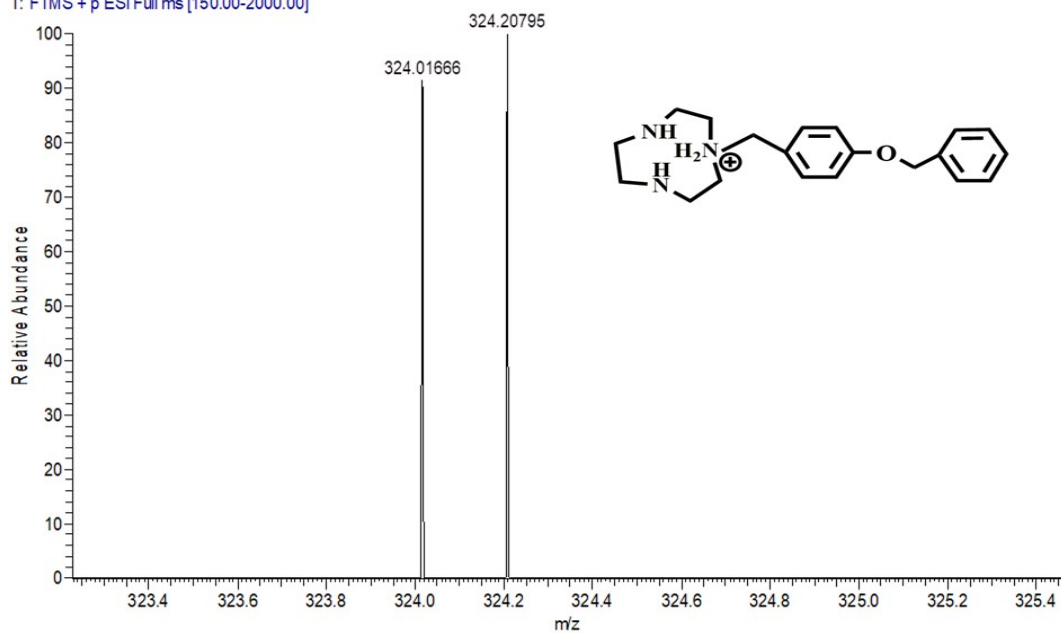

C

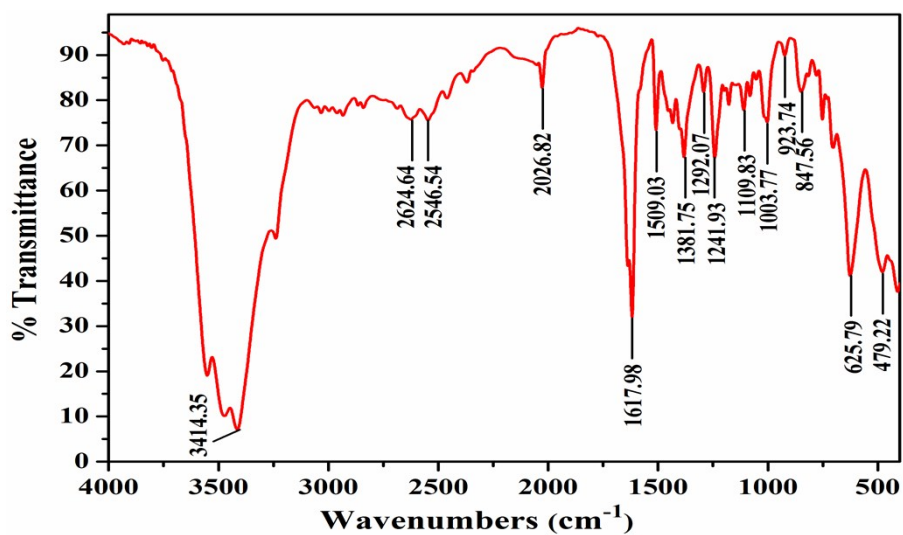

D

**Fig. S2.** Synthesis of btacn: (A) 400 MHz <sup>1</sup>H NMR (CDCl<sub>3</sub>, 298 K); (B) 100 MHz <sup>13</sup>C NMR (CDCl<sub>3</sub>, 305 K); (C) ESI-mass spectrum. Attributions: 324.21, [M+H<sup>+</sup>]<sup>+</sup>; (D) FTIR patterns.

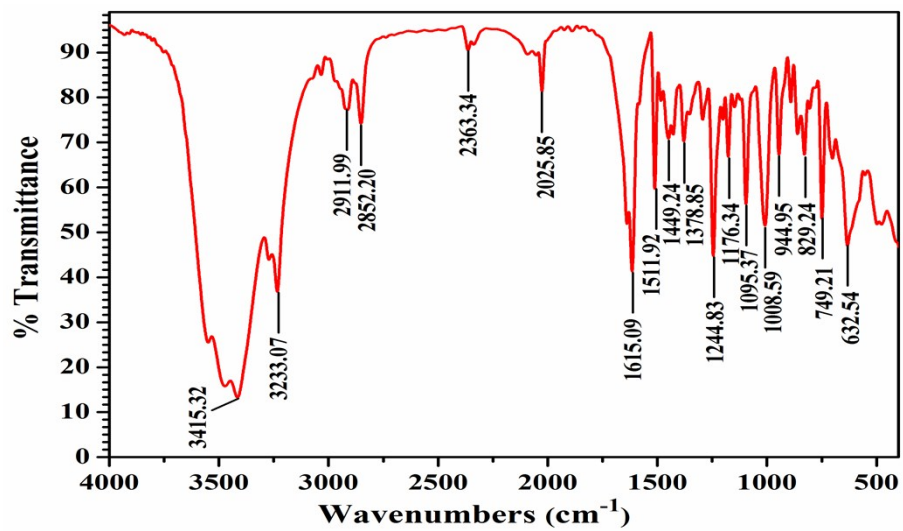

Fig. S3. FTIR patterns for Cu(btacn)Cl<sub>2</sub>.

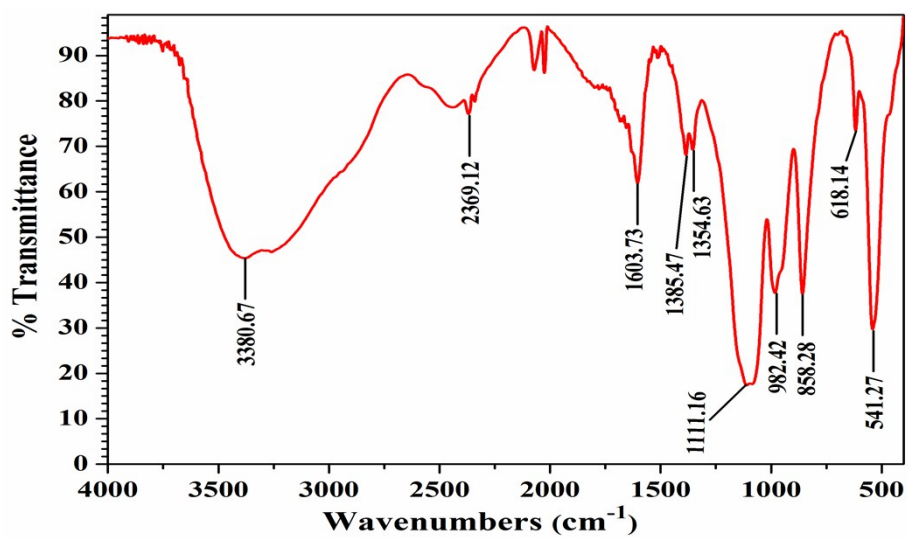

A

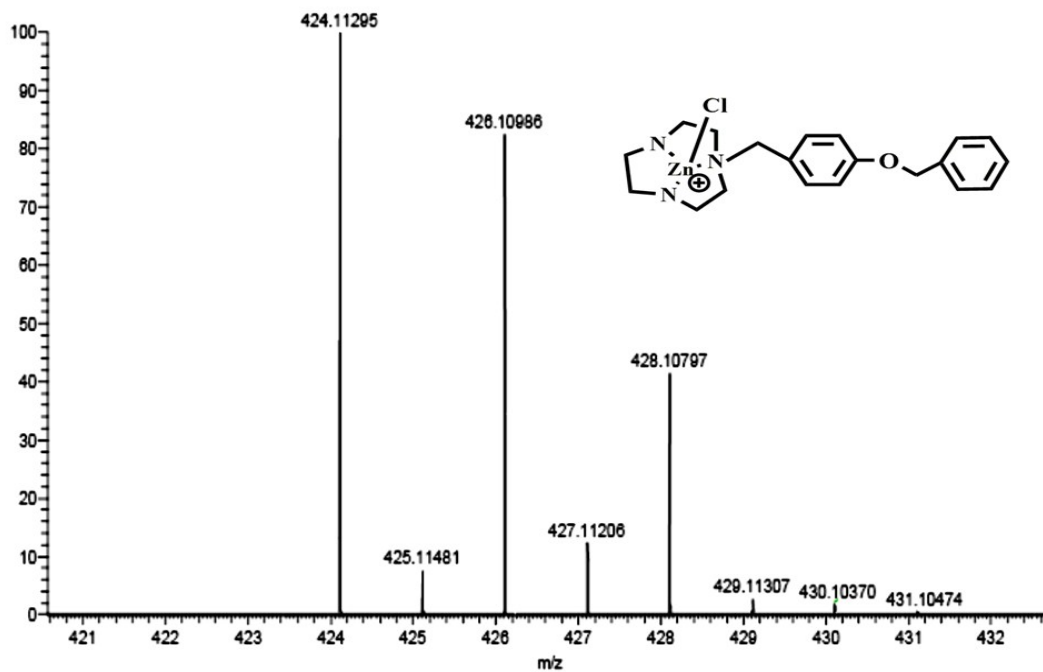

B

Fig. S4.(A) FTIR patterns for Zn(btacn)Cl<sub>2</sub>. (B) Electrospray mass spectra and the isotope distribution patterns for Zn(btacn)Cl<sub>2</sub>. Attributions: 426.113, [M-Cl]<sup>+</sup>.

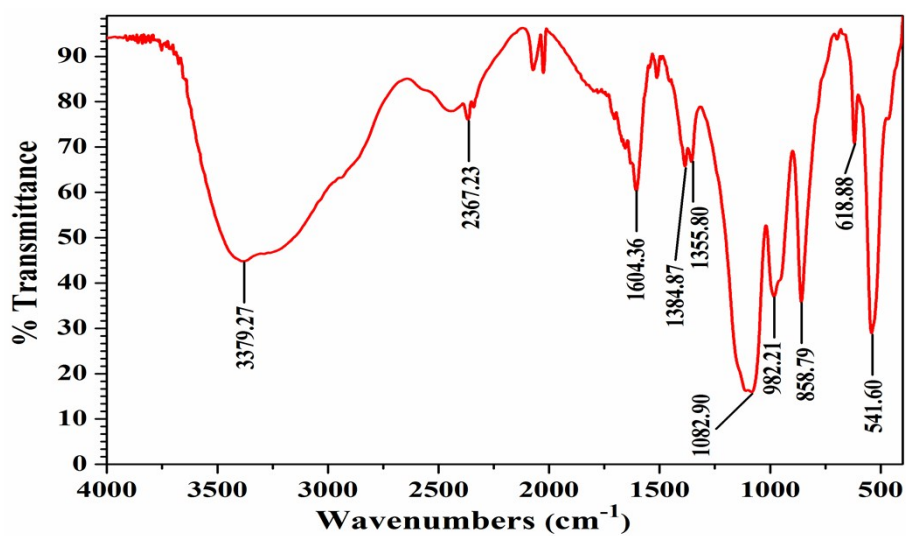

A

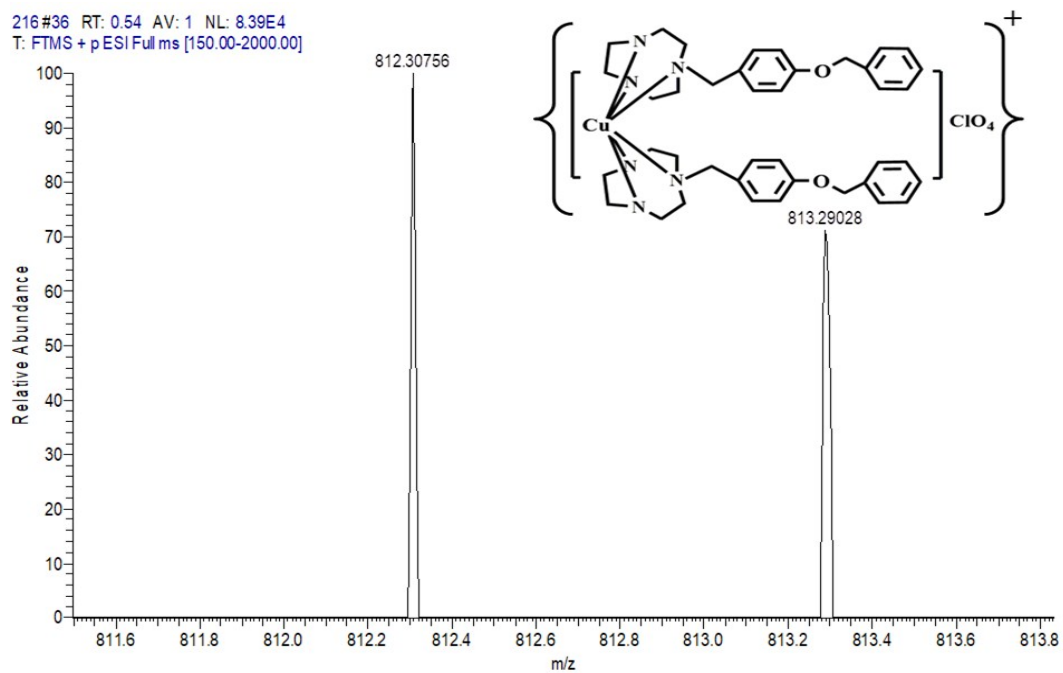

**B**

**Fig. S5.**(A)FTIR patterns for  $[Cu(btacn)_2] \cdot (ClO_4)_2$ . (B) Electrospray mass spectra and the isotope distribution patterns for  $[Cu(btacn)_2] \cdot (ClO_4)_2$ . Attributions: 813.3,  $[M-ClO_4]^-$ .



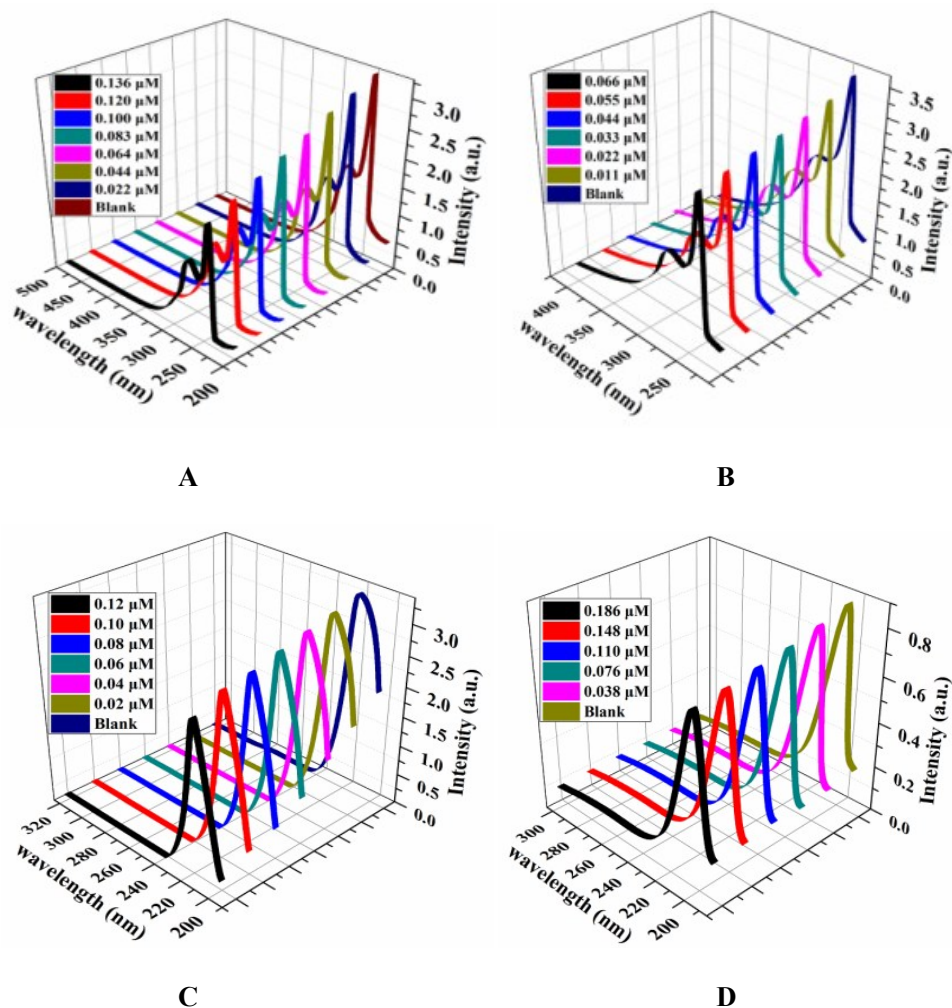

**Fig. S6.** Absorption spectra of the compounds in the absence and presence of increasing amounts of CT-DNA at room temperature in 5 mM Tris-HCl/NaCl buffer (pH 7.4), the dashed lines indicate the free compound. (A) [Cu(btacn)<sub>2</sub>](ClO<sub>4</sub>)<sub>2</sub> (4.63 × 10<sup>-4</sup> M), CT-DNA (0.0, 2.2 × 10<sup>-5</sup> M, 4.4 × 10<sup>-5</sup> M, 6.4 × 10<sup>-5</sup> M, 8.3 × 10<sup>-5</sup> M, 1.0 × 10<sup>-4</sup> M, 1.2 × 10<sup>-4</sup> M, 1.36 × 10<sup>-4</sup> M). (B) Cu(btacn)Cl<sub>2</sub> (2.0 × 10<sup>-4</sup> M), CT-DNA (0.0, 1.1 × 10<sup>-5</sup> M, 2.2 × 10<sup>-5</sup> M, 3.3 × 10<sup>-5</sup> M, 4.4 × 10<sup>-5</sup> M, 5.5 × 10<sup>-5</sup> M, 6.6 × 10<sup>-5</sup> M). (C) Zn(btacn)Cl<sub>2</sub> (1.6 × 10<sup>-4</sup> M), CT-DNA (0.0, 2.0 × 10<sup>-5</sup> M, 4.0 × 10<sup>-5</sup> M, 6.0 × 10<sup>-5</sup> M, 8.0 × 10<sup>-5</sup> M, 1.0 × 10<sup>-4</sup> M, 1.2 × 10<sup>-4</sup> M). (D) btacn (1.0 × 10<sup>-5</sup> M), CT-DNA (0.0, 3.8 × 10<sup>-5</sup> M, 7.6 × 10<sup>-5</sup> M, 1.1 × 10<sup>-4</sup> M, 1.48 × 10<sup>-4</sup> M, 1.86 × 10<sup>-4</sup> M).

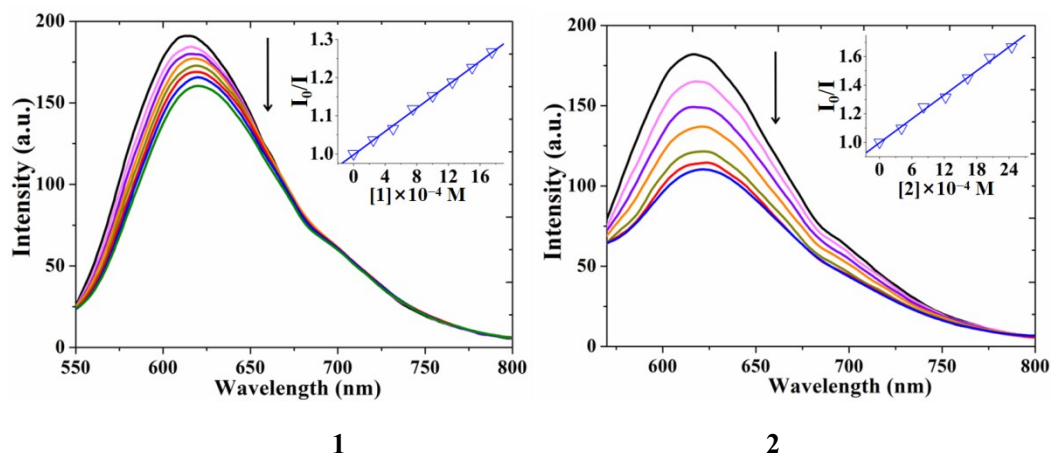

**Fig. S7.** Fluorescence quenching curves of the complexes to EB-DNA, [DNA] = 6.0  $\mu\text{M}$ , [EB] = 4.0  $\mu\text{M}$  and Stern–Volmer plots of the fluorescence titrations (Insert figure): (1)  $[\text{Cu}(\text{btacn})\text{Cl}_2] = 0\text{--}175 \mu\text{M}$ ; (2)  $[[\text{Cu}(\text{btacn})_2] \cdot (\text{ClO}_4)_2] = 0\text{--}245 \mu\text{M}$ .

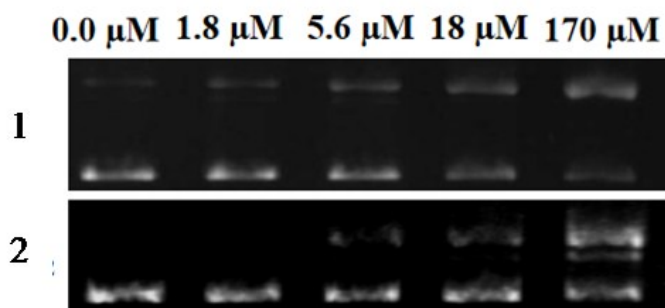

**Fig. S8.** Various amounts of (1)  $\text{Cu}(\text{btacn})\text{Cl}_2$  and (2)  $[\text{Cu}(\text{btacn})_2] \cdot (\text{ClO}_4)_2$  were reacted with a constant concentration of DNA for 3 h at 37  $^\circ\text{C}$  in pH 7.4 Tris–HCl/NaCl buffer analyzed by agarose gel electrophoresis.

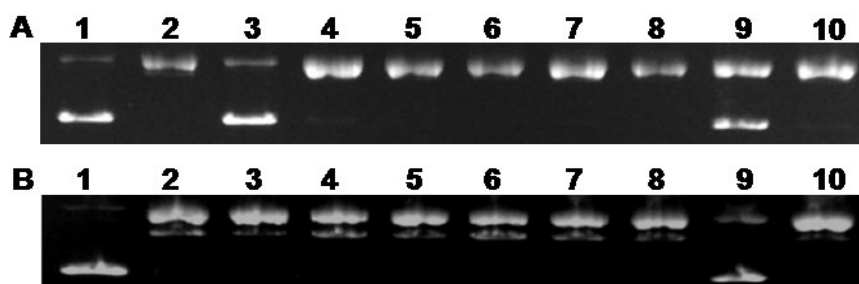

**Fig.S9.** Gel electrophoresis diagram showing the cleavage of pBR322 DNA in the presence of different additives at pH 7.4 and 37 °C for 24 h under aerobic condition: Lane 1: DNA control; Lane 2: DNA +2.0 mM Cu(btacn)Cl<sub>2</sub> (A){0.5 mM [Cu(btacn)<sub>2</sub>](ClO<sub>4</sub>)<sub>2</sub>(B)}; Lane 3–10: DNA + complex+ 1 mM DMSO; 200 Unit/ml SOD; 25 mM L-histidine; 200 Unit/ml catalase; 0.05 mM methyl green; 10 Unit/mL SYBR Green; 50 mM KI; 25 M NaN<sub>3</sub>.

**Table S1**

Selected bond lengths (Å) and angles (°) for Cu(btacn)Cl<sub>2</sub>.

|                  |           |                   |           |
|------------------|-----------|-------------------|-----------|
| Cu(1)-N(1)       | 2.264(18) | Cu(1)-Cl(1)       | 2.267(6)  |
| Cu(1)-N(2)       | 2.039(19) | Cu(1)-Cl(2)       | 2.277(7)  |
| Cu(1)-N(3)       | 2.038(18) |                   |           |
| N(1)-Cu(1)-Cl(1) | 100.71(5) | Cl(1)-Cu(1)-Cl(2) | 95.59(3)  |
| N(1)-Cu(1)-Cl(2) | 107.57(5) | N(3)-Cu(1)-Cl(1)  | 172.16(6) |
| N(2)-Cu(1)-Cl(1) | 90.86(6)  | N(3)-Cu(1)-Cl(2)  | 89.96(6)  |
| N(2)-Cu(1)-N(1)  | 83.33(7)  | N(3)-Cu(1)-N(2)   | 82.55(8)  |
| N(2)-Cu(1)-Cl(2) | 165.97(6) | N(3)-Cu(1)-N(1)   | 82.81(7)  |

**Table S2**Crystal data and structure refinement for Cu(btacn)Cl<sub>2</sub>.

| complex                                             | Cu(btacn)Cl <sub>2</sub>                                                     |
|-----------------------------------------------------|------------------------------------------------------------------------------|
| CCDC number                                         | 1557714                                                                      |
| Empirical formula                                   | C <sub>20</sub> H <sub>27</sub> Cl <sub>2</sub> CuN <sub>3</sub> O           |
| Formula weight                                      | 459.88                                                                       |
| Crystal system                                      | orthorhombic                                                                 |
| Space group                                         | <i>P</i> <sub>bca</sub>                                                      |
| Temperature(K)                                      | 154.4(2)                                                                     |
| <i>a</i> (Å)                                        | 8.1762(3)                                                                    |
| <i>b</i> (Å)                                        | 12.4060(4)                                                                   |
| <i>c</i> (Å)                                        | 40.2745(12)                                                                  |
| <i>α</i> (°)                                        | 90                                                                           |
| <i>β</i> (°)                                        | 90                                                                           |
| <i>γ</i> (°)                                        | 90                                                                           |
| <i>Z</i>                                            | 8                                                                            |
| Calculated density (mg/m <sup>3</sup> )             | 1.495                                                                        |
| Absorption coefficient (mm <sup>-1</sup> )          | 1.346                                                                        |
| F(000)                                              | 1912.0                                                                       |
| Crystal size (mm <sup>3</sup> )                     | 0.25 × 0.18 × 0.17                                                           |
| Limiting indices                                    | -9 ≤ <i>h</i> ≤ 9, -14 ≤ <i>k</i> ≤ 12, -46 ≤ <i>l</i> ≤ 47                  |
| Reflections collected                               | 36032                                                                        |
| Independent reflections                             | 3601 [ <i>R</i> <sub>int</sub> = 0.0475, <i>R</i> <sub>sigma</sub> = 0.0236] |
| Data / restraints / parameters                      | 3601/0/244                                                                   |
| Goodness-of-fit on F <sup>2</sup>                   | 1.051                                                                        |
| Final <i>R</i> indices [ <i>I</i> > 2σ( <i>I</i> )] | <i>R</i> <sub>1</sub> = 0.0301, <i>wR</i> <sub>2</sub> = 0.0686              |
| <i>R</i> indices (all data)                         | <i>R</i> <sub>1</sub> = 0.0349, <i>wR</i> <sub>2</sub> = 0.0718              |

**Table S3**

Electronic absorption spectral data between CT-DNA with synthesized compounds in Tris-HCl buffer solution.

| Compounds                                                         |       | [Cu(btacn) <sub>2</sub> ](ClO <sub>4</sub> ) <sub>2</sub> | Cu(btacn)Cl <sub>2</sub> | Zn(btacn)Cl <sub>2</sub> | btacn |
|-------------------------------------------------------------------|-------|-----------------------------------------------------------|--------------------------|--------------------------|-------|
| Band position ( $\pi\text{--}\pi^*$ ) $\lambda_{\text{max}}$ (nm) | Free  | 240                                                       | 237                      | 217.2                    | 201   |
|                                                                   | Bound | 242                                                       | 237.2                    | 219.4                    | 203   |
| Red shift $\Delta\lambda$                                         |       | 2                                                         | 0.2                      | 2.2                      | 2     |
| Chromism effect (%)                                               |       | 34.8                                                      | 19.4                     | 24.2                     | 16.0  |
| Band position ( $n\text{--}\pi$ ) $\lambda_{\text{max}}$ (nm)     | Free  | 270                                                       | 269                      | –                        | –     |
|                                                                   | Bound | 272                                                       | 269.8                    | –                        | –     |
| Red shift $\Delta\lambda$                                         |       | 2                                                         | 0.8                      | –                        | –     |
| Chromism effect (%)                                               |       | 18.8                                                      | 23.8                     | –                        | –     |
